# Supplementary material for: The fate of an old Mn–Fe amphibole species: description of clino-ferro-suenoite, □Mn2Fe2+5Si8O22(OH)2
Source: Copernicus journal article supplement (doi:10.5194/ejm-37-221-2025), 2025-03-26
Supplement: Supplementary file 1 [file ejm-37-221-2025-supplement.zip]

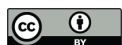

*Supplement of*

**The fate of an old Mn–Fe amphibole species: description of clino-ferro-suenoite,  $\square\text{Mn}_2\text{Fe}_5^{2+}\text{Si}_8\text{O}_{22}(\text{OH})_2$**

**Dan Holtstam et al.**

*Correspondence to:* Dan Holtstam ([dan.holtstam@nrm.se](mailto:dan.holtstam@nrm.se))

- [ejm-37-221-2025-supplement-title-page.pdf](#)
- Supplement rev
  - [Supplement Tables.pdf](#)
  - [clino-ferro-suenoite.cif](#)

The copyright of individual parts of the supplement might differ from the article licence.
