# Supplementary material for: The fate of an old Mn–Fe amphibole species: description of clino-ferro-suenoite, □Mn2Fe2+5Si8O22(OH)2
Source: Copernicus journal article supplement (doi:10.5194/ejm-37-221-2025), 2025-03-26
Supplement: Supplementary file 2 [file ejm-37-221-2025-supplement.zip]

**Table S1.** Chemical composition of associated olivine and amphibole inclusions.

|                                | Fayalite | Ferro-<br>actinolite |
|--------------------------------|----------|----------------------|
| SiO <sub>2</sub>               | 30.59    | 52.09                |
| Al <sub>2</sub> O <sub>3</sub> | 0.03     | 0.19                 |
| TiO <sub>2</sub>               | 0.03     | 0.01                 |
| FeO                            | 51.21    | 19.02                |
| MnO                            | 17.91    | 3.22                 |
| ZnO                            | 0.00     | 0.11                 |
| MgO                            | 0.97     | 7.02                 |
| CaO                            | 0.00     | 10.65                |
| Na <sub>2</sub> O~             | 0.00     | 0.02                 |
| K <sub>2</sub> O               | 0.00     | 0.00                 |
| F                              | 0.11     | 0.00                 |
| H <sub>2</sub> O*              | 0.00     | 1.05                 |
| TOTAL                          | 100.85   | 100.43               |
| O=F                            | 0.04     | 0.00                 |
| TOTAL                          | 100.81   | 100.43               |

**Table S2.** LA-ICP-MS analyses of clino-ferro-suenoite and standards

All\_values\_are\_in\_ppm

| Element | GSD2g-1   | GSD2g-2   | BCR2g    | 191917<br>54_1 | 191917<br>54_2 | 191917<br>54_3 | ARM<br>3 | GSD2<br>g-3 | GSD2<br>g-4 |
|---------|-----------|-----------|----------|----------------|----------------|----------------|----------|-------------|-------------|
| Li7     | 42.87     | 42.29     | 9.26     | <0.56          | <0.56          | <0.59          | 17.1     | 42.4        | 42.75       |
| Be9     | 46.37     | 44.12     | 1.67     | <0.278         | 0.035          | 0.106          | 5.24     | 45.17       | 45.44       |
| B11     | 39.49     | 40.88     | 4.85     | <2.32          | <2.37          | <2.30          | 52.9     | 42.7        | 38.48       |
| Mg25    | 21228.89  | 21389.06  | 21585.84 | 34188.         | 33395.         | 33298.         | 2077     | 21207       | 21371       |
|         |           |           |          | 9              | 09             | 06             | 9.43     | .9          | .82         |
| Si29    | 260899.91 | 260899.91 | 253000.2 | 235589         | 235589         | 235589         | 2818     | 26089       | 26089       |
|         |           |           |          | .47            | .45            | .47            | 58       | 9.88        | 9.88        |
| Ca43    | 46126.54  | 45841.14  | 49150.39 | 7257.3         | 6597.7         | 6904.4         | 3745     | 46176       | 45864       |
|         |           |           |          | 5              | 5              | 4              | 9.16     | .44         | .16         |
| Ca44    | 45768.07  | 46259.32  | 48833.1  | 6839.9         | 7222.5         |                | 3690     | 45893       | 46064       |
|         |           |           |          | 7403           | 9              | 9              | 1.61     | .67         | .52         |
| Sc45    | 41.82     | 42.05     | 34.76    | 12.13          | 11.06          | 11.28          | 15.24    | 41.89       | 41.95       |
|         |           |           |          |                |                |                | 6111.    | 7104.       | 7097.       |
| Ti49    | 7110.29   | 7088.55   | 13380.06 | 51.8           | 58.7           | 59.42          | 33       | 66          | 24          |
|         |           |           |          |                |                |                |          |             |             |
| V51     | 44.69     | 44.04     | 425.39   | 1.26           | 1.136          | 1.386          | 10.74    | 44.36       | 44.42       |
| Cr53    | 44.71     | 44.11     | 16.03    | <1.21          | <1.29          | <1.22          | 9.22     | 43.1        | 45.44       |
|         |           |           |          | 59377.         | 59499.         | 58748.         | 368.0    | 640.2       | 641.5       |
| Mn55    | 640.07    | 642.09    | 1539.06  | 93             | 26             | 14             | 7        | 1           | 7           |
|         |           |           |          | 267776         | 268454         | 267658         | 4501     | 92958       | 92010       |
| Fe57    | 93153.08  | 91558.02  | 96240.99 | .03            | .06            | .22            | 9.33     | .86         | .83         |
| Co59    | 38.32     | 39.33     | 37.61    | <0.170         | <0.160         | 0.2            | 7.13     | 38.54       | 38.95       |
| Ni60    | 45.85     | 45.97     | 12.39    | <0.36          | 0.38           | <0.37          | 10.88    | 47.07       | 45.07       |
| Cu65    | 37.87     | 36.01     | 16.64    | <0.33          | <0.38          | <0.31          | 11.73    | 37.11       | 36.93       |
| Rb85    | 38.26     | 38.34     | 45.47    | <0.094         | <0.090         | <0.092         | 7.1      | 38.92       | 37.85       |
| Sr88    | 66.28     | 66.18     | 326.64   | 0.089          | 0.105          | 0.096          | 19.04    | 66.79       | 65.83       |
| Y89     | 42.43     | 43.43     | 31.88    | 0.055          | 0.082          | 0.066          | 7.33     | 42.92       | 42.84       |
| Zr90    | 44.72     | 46.06     | 174.9    | 0.038          | 0.057          | 0.049          | 12.12    | 44.62       | 45.85       |
| Nb93    | 45.87     | 45.37     | 11.5     | 0.327          | 0.291          | 0.374          | 12.36    | 46.27       | 45.19       |
|         |           |           |          | <0.019         | <0.014         | <0.020         |          |             |             |
| Cs133   | 31.98     | 32.07     | 1.14     | 0              | 8              | 8              | 7.03     | 32.23       | 31.87       |
| Ba137   | 45.23     | 44.02     | 644.48   | 0.078          | 0.03           | 0.076          | 27.12    | 44.19       | 45.04       |
|         |           |           |          |                |                | <0.005         |          |             |             |
| La139   | 39.77     | 39.31     | 24.06    | 0.001          | 0.0041         | 0              | 6.37     | 39.72       | 39.45       |
| Ce140   | 42.54     | 42.35     | 51.61    | 0.0157         | 0.0117         | 0.0133         | 8.14     | 42.82       | 42.19       |
| Pr141   | 42.28     | 42.37     | 6.55     | 0.0059         | 0.0082         | 0.0098         | 5.57     | 42.3        | 42.33       |
| Nd146   | 43.61     | 44.89     | 28.76    | 0.038          | 0.073          | 0.119          | 7.96     | 44.88       | 43.68       |
| Sm149   | 42.93     | 43.65     | 6.03     | 0.099          | 0.085          | 0.097          | 6.08     | 43.6        | 43          |
| Eu151   | 41.8      | 41.82     | 1.843    | 0.0576         | 0.0553         | 0.08           | 5.61     | 41.72       | 41.87       |
| Gd157   | 41.9      | 42.49     | 6.28     | 0.084          | 0.068          | 0.069          | 5.77     | 42.85       | 41.67       |
| Tb159   | 42.39     | 42.73     | 0.97     | 0.0063         | 0.0112         | 0.0111         | 6.45     | 42.31       | 42.72       |
| Dy163   | 42.24     | 44.19     | 6.13     | 0.0224         | 0.037          | 0.034          | 6.24     | 43.35       | 42.92       |
|         |           |           |          |                | 0.0013         | <0.003         |          |             |             |
| Ho165   | 43.18     | 43.22     | 1.137    | 0.002          | 7              | 3              | 7        | 43.19       | 43.21       |

|       |       |       |       |        |        |        |       |       |       |
|-------|-------|-------|-------|--------|--------|--------|-------|-------|-------|
| Er167 | 41.51 | 42.51 | 3.37  | 0.0091 | <0.00  | <0.00  | 6.39  | 42    | 41.92 |
|       |       |       |       | 0.0006 | <0.003 | <0.003 |       |       |       |
| Tm169 | 42.32 | 43.03 | 0.492 | 4      | 10     | 13     | 6.23  | 42.91 | 42.44 |
| Yb173 | 45.72 | 46.96 | 3.36  | <0.026 | 0.0039 | 0.0039 | 9.09  | 47.09 | 45.69 |
|       |       |       |       |        |        | <0.004 |       |       |       |
| Lu175 | 46.37 | 46.43 | 0.465 | <0.00  | <0.00  | 4      | 6.47  | 46.4  | 46.39 |
| Hf177 | 40.05 | 40.56 | 4.43  | 0.0161 | 0.0097 | 0.0132 | 6.13  | 40.64 | 40.01 |
| Ta181 | 43.43 | 42.92 | 0.766 | 0.0176 | 0.0135 | 0.0219 | 6.36  | 43.03 | 43.32 |
| Pb208 | 30.8  | 30.52 | 10.95 | 0.099  | <0.034 | 0.045  | 12.68 | 30.76 | 30.61 |
| Th232 | 42.93 | 43.84 | 5.56  | 0.0432 | 0.0195 | 0.0153 | 3.37  | 43.27 | 43.39 |
| U238  | 42.15 | 41.97 | 1.686 | 0.012  | 0.0054 | 0.005  | 3.57  | 42.57 | 41.71 |

l\_sigma\_error.

| Element | GSD2g-1 | GSD2g-2 | BCR2g   | 191917<br>54_1 | 191917<br>54_2 | 191917<br>54_3 | ARM<br>3 | GSD2<br>g-3 | GSD2<br>g-4 |
|---------|---------|---------|---------|----------------|----------------|----------------|----------|-------------|-------------|
| Li7     | 1.54    | 1.5     | 0.52    | 0.22           | 0.22           | 0.23           | 0.76     | 1.53        | 1.56        |
| Be9     | 2.8     | 2.65    | 0.31    | 0.098          | 0.035          | 0.062          | 0.63     | 3.07        | 3.2         |
| B11     | 3.8     | 3.83    | 1.51    | 0.95           | 0.95           | 0.95           | 6.2      | 5.42        | 5.32        |
|         |         |         |         | 1063.3         |                | 1045.4         | 657.4    | 675.7       | 686.6       |
| Mg25    | 658.11  | 663.16  | 670.32  | 7              | 1043           | 8              | 9        | 6           | 3           |
|         |         |         |         | 7460.7         | 7460.8         | 7461.0         |          | 8266.       | 8266.       |
| Si29    | 8270.55 | 8268.3  | 8017.4  | 2              | 4              | 4              | 8931     | 1           | 29          |
|         |         |         |         |                |                |                | 1224.    | 1495.       | 1494.       |
| Ca43    | 1475.32 | 1461.58 | 1561.83 | 264.5          | 246.08         | 257.48         | 18       | 17          | 24          |
|         |         |         |         |                |                |                | 1162.    | 1455.       | 1473.       |
| Ca44    | 1411.91 | 1427.04 | 1508.59 | 231.87         | 215.46         | 228.52         | 98       | 49          | 1           |
| Sc45    | 1.38    | 1.37    | 1.15    | 0.44           | 0.41           | 0.42           | 0.58     | 1.37        | 1.37        |
|         |         |         |         |                |                |                | 186.6    | 216.6       | 216.5       |
| Ti49    | 216.66  | 215.83  | 405.93  | 2.42           | 2.65           | 2.68           | 3        | 3           | 7           |
| V51     | 1.48    | 1.46    | 13.39   | 0.083          | 0.078          | 0.088          | 0.42     | 1.52        | 1.54        |
| Cr53    | 2.71    | 2.58    | 1.34    | 0.49           | 0.51           | 0.49           | 1.07     | 2.98        | 3.27        |
|         |         |         |         | 1791.6         | 1796.3         | 1775.0         |          |             |             |
| Mn55    | 19.37   | 19.43   | 46.49   | 7              | 7              | 1              | 11.19    | 19.44       | 19.5        |
|         |         |         |         | 8737.1         |                | 8995.6         | 1545.    | 3258.       | 3304.       |
| Fe57    | 2990.35 | 2944.55 | 3113.02 | 9              | 8875.3         | 6              | 31       | 55          | 63          |
| Co59    | 1.37    | 1.4     | 1.35    | 0.067          | 0.067          | 0.07           | 0.34     | 1.57        | 1.64        |
| Ni60    | 2.1     | 2.08    | 0.73    | 0.15           | 0.15           | 0.16           | 0.76     | 2.56        | 2.58        |
| Cu65    | 1.75    | 1.67    | 0.88    | 0.13           | 0.15           | 0.14           | 0.77     | 2.14        | 2.25        |
| Rb85    | 1.35    | 1.35    | 1.61    | 0.037          | 0.035          | 0.036          | 0.31     | 1.57        | 1.59        |
| Sr88    | 2.11    | 2.11    | 10.28   | 0.014          | 0.014          | 0.014          | 0.66     | 2.23        | 2.23        |
| Y89     | 1.43    | 1.46    | 1.09    | 0.011          | 0.013          | 0.012          | 0.29     | 1.57        | 1.61        |
| Zr90    | 1.76    | 1.81    | 6.77    | 0.012          | 0.015          | 0.016          | 0.6      | 2.12        | 2.28        |
| Nb93    | 1.58    | 1.57    | 0.43    | 0.028          | 0.027          | 0.031          | 0.5      | 1.8         | 1.82        |
| Cs133   | 1.01    | 1.01    | 0.053   | 0.008          | 0.0066         | 0.0079         | 0.24     | 1.04        | 1.04        |
| Ba137   | 1.76    | 1.7     | 23.13   | 0.028          | 0.015          | 0.024          | 1.22     | 1.95        | 2.06        |
| La139   | 1.26    | 1.24    | 0.77    | 0.001          | 0.0021         | 0.0015         | 0.23     | 1.3         | 1.31        |
| Ce140   | 1.36    | 1.35    | 1.65    | 0.0038         | 0.0038         | 0.0036         | 0.29     | 1.44        | 1.44        |
| Pr141   | 1.29    | 1.29    | 0.21    | 0.0021         | 0.0025         | 0.0027         | 0.19     | 1.29        | 1.29        |
| Nd146   | 1.72    | 1.76    | 1.17    | 0.013          | 0.018          | 0.023          | 0.42     | 2.12        | 2.16        |
| Sm149   | 1.52    | 1.53    | 0.29    | 0.023          | 0.021          | 0.023          | 0.31     | 1.65        | 1.66        |
| Eu151   | 1.3     | 1.29    | 0.082   | 0.0091         | 0.0089         | 0.011          | 0.2      | 1.29        | 1.3         |

|       |      |      |       |        |        |        |      |      |      |
|-------|------|------|-------|--------|--------|--------|------|------|------|
| Gd157 | 1.58 | 1.59 | 0.31  | 0.022  | 0.018  | 0.019  | 0.31 | 1.83 | 1.85 |
| Tb159 | 1.33 | 1.34 | 0.043 | 0.0021 | 0.0028 | 0.0031 | 0.22 | 1.37 | 1.4  |
| Dy163 | 1.71 | 1.79 | 0.29  | 0.008  | 0.01   | 0.01   | 0.34 | 2.17 | 2.26 |
| Ho165 | 1.32 | 1.32 | 0.048 | 0.0012 | 7      | 0.0017 | 0.23 | 1.31 | 1.31 |
| Er167 | 1.43 | 1.46 | 0.17  | 0.0053 | <0.00  | <0.00  | 0.28 | 1.57 | 1.6  |
| Tm169 | 1.37 | 1.39 | 0.027 | 0.0006 | 0.0009 | 0.0009 |      |      |      |
| Yb173 | 1.81 | 1.86 | 0.19  | 4      | 5      | 6      | 0.23 | 1.49 | 1.51 |
| Lu175 | 1.41 | 1.41 | 0.025 | 0.011  | 0.0039 | 0.0039 | 0.46 | 2.23 | 2.26 |
| Hf177 | 1.37 | 1.38 | 0.2   | <0.00  | <0.00  | 0.0014 | 0.21 | 1.41 | 1.41 |
| Ta181 | 1.36 | 1.35 | 0.036 | 0.0072 | 0.0056 | 0.0066 | 0.27 | 1.47 | 1.48 |
| Pb208 | 0.97 | 0.96 | 0.36  | 0.004  | 0.003  | 0.004  | 0.22 | 1.4  | 1.42 |
| Th232 | 1.4  | 1.43 | 0.19  | 0.015  | 0.014  | 0.014  | 0.42 | 0.99 | 0.99 |
| U238  | 1.38 | 1.37 | 0.064 | 0.0054 | 0.0036 | 0.0032 | 0.13 | 1.52 | 1.55 |
|       |      |      |       | 0.0023 | 0.0016 | 0.0015 | 0.13 | 1.52 | 1.53 |

Minimum\_detection\_limits\_(99%\_confidence).

| Element | GSD2g-1  | GSD2g-2  | BCR2g    | 191917<br>54_1 | 191917<br>54_2 | 191917<br>54_3 | ARM<br>3 | GSD2<br>g-3 | GSD2<br>g-4 |
|---------|----------|----------|----------|----------------|----------------|----------------|----------|-------------|-------------|
| Li7     | 1.01     | 0.909    | 0.828    | 0.564          | 0.562          | 0.588          | 0.894    | 0.75        | 0.746       |
| Be9     | <0.00000 | <0.00000 | 0.231    | 0.278          | <0.000         | <0.000         | 0.362    | <0.00       | 0.228       |
| B11     | 4.48     | 3.9      | 3.5      | 2.32           | 2.37           | 2.3            | 3.27     | 2.86        | 2.97        |
| Mg25    | 3.15     | 3.06     | 2.83     | 1.96           | 1.99           | 2.07           | 3.29     | 2.78        | 3.11        |
| Si29    | 579.6    | 525.96   | 490.3    | 338.64         | 338.88         | 338.22         | 506.1    | 450.5       | 457.4       |
| Ca43    | 252.77   | 240.16   | 237.97   | 157.11         | 162.87         | 170.57         | 9        | 6           | 8           |
| Ca44    | 86.38    | 77.41    | 72.33    | 50.23          | 50.78          | 50.85          | 221.0    | 224.0       |             |
| Sc45    | 0.658    | 0.575    | 0.54     | 0.372          | 0.367          | 0.378          | 245.7    | 8           | 5           |
| Ti49    | 1.72     | 1.65     | 1.28     | 1.02           | 1.01           | 0.875          | 78.61    | 68.65       | 70.09       |
| V51     | 0.14     | 0.105    | 0.0828   | 0.0829         | 0.0717         | 0.0783         | 0.541    | 0.486       | 0.496       |
| Cr53    | 2.44     | 1.94     | 1.78     | 1.21           | 1.29           | 1.22           | 0.81     | 1.55        | 1.31        |
| Mn55    | 0.57     | 0.515    | 0.485    | 0.324          | 0.346          | 0.354          |          | 0.094       |             |
| Fe57    | 25.61    | 22.56    | 21.44    | 14.36          | 14.84          | 14.27          | 0.113    | 0.107       | 8           |
| Co59    | 0.264    | 0.25     | 0.233    | 0.17           | 0.16           | 0.162          | 1.61     | 1.61        | 1.67        |
| Ni60    | 0.802    | 0.573    | 0.444    | 0.361          | 0.32           | 0.367          | 0.53     | 0.476       | 0.48        |
| Cu65    | 0.575    | 0.592    | 0.473    | 0.33           | 0.379          | 0.313          | 0.20.83  | 18.28       | 18.4        |
| Rb85    | 0.137    | 0.138    | 0.133    | 0.0937         | 0.0896         | 0.0917         | 0.261    | 0.231       | 0.228       |
| Sr88    | 0.0265   | <0.00000 | 0.0113   | 0.0157         | 0.0115         | 0.0143         | 0.622    | 0.528       | 0.6         |
| Y89     | 0.0146   | 0.0133   | 0.0124   | 0.0121         | 8              | 8              | 0.509    | 0.464       | 0.473       |
| Zr90    | <0.00000 | <0.00000 | 0.0256   | <0.000         | <0.000         | 0.0185         | 0.135    | 0.119       | 0.121       |
| Nb93    | 0.0213   | 0.0138   | <0.00000 | 0.0179         | 0.0207         | 0.0163         | 0.027    | 0.029       | 0.019       |
| Cs133   | 0.0278   | 0.0202   | 0.0238   | 0.019          | 0.0148         | 0.0208         | 8        | 1           | 1           |
| Ba137   | <0.00000 | 0.0536   | <0.00000 | 0.0346         | 00             | 00             | 0.013    | 0.011       | <0.00       |

|       |          |          |          |              |              |              |              |              |              |
|-------|----------|----------|----------|--------------|--------------|--------------|--------------|--------------|--------------|
| La139 | <0.00000 | <0.00000 | <0.00000 | <0.000<br>00 | <0.000<br>00 | 0.0050<br>2  | <0.00<br>000 | <0.00<br>000 | <0.00<br>000 |
| Ce140 | <0.00000 | <0.00000 | <0.00000 | <0.000<br>00 | 0.0044<br>8  | <0.000<br>00 | <0.00<br>000 | <0.00<br>000 | 0.006<br>06  |
| Pr141 | 0.00584  | <0.00000 | 0.00498  | <0.000<br>00 | <0.000<br>00 | <0.000<br>00 | <0.00<br>000 | <0.00<br>000 | 0.004<br>79  |
| Nd146 | <0.00000 | <0.00000 | 0.0288   | <0.000<br>00 | <0.000<br>00 | <0.000<br>00 | <0.00<br>000 | 0.028<br>000 | <0.00<br>000 |
| Sm149 | <0.00000 | <0.00000 | 0.0354   | <0.000<br>00 | <0.000<br>00 | <0.000<br>00 | <0.00<br>000 | <0.00<br>000 | <0.00<br>000 |
| Eu151 | <0.00000 | <0.00000 | <0.00000 | <0.000<br>00 | <0.000<br>00 | <0.000<br>00 | <0.00<br>000 | 0.008<br>88  | 0.008<br>85  |
| Gd157 | <0.00000 | 0.0351   | 0.0326   | 0.0226<br>00 | <0.000<br>00 | <0.000<br>00 | <0.00<br>000 | <0.00<br>000 | <0.00<br>000 |
| Tb159 | <0.00000 | <0.00000 | <0.00000 | <0.000<br>00 | <0.000<br>00 | 0.0034<br>00 | 0.020<br>6   | 0.025<br>7   | <0.00<br>000 |
| Dy163 | <0.00000 | <0.00000 | <0.00000 | <0.000<br>00 | <0.000<br>00 | 0.0033<br>3  | 0.007<br>08  | <0.00<br>000 | 0.004<br>41  |
| Ho165 | <0.00000 | 0.00498  | <0.00000 | <0.000<br>00 | <0.000<br>00 | <0.000<br>00 | 0.022<br>3   | <0.00<br>000 | <0.00<br>000 |
| Er167 | 0.0243   | <0.00000 | 0.0206   | <0.000<br>00 | <0.000<br>00 | 0.0031<br>3  | 0.006<br>66  | 0.004<br>14  | 0.004<br>13  |
| Tm169 | <0.00000 | 0.00472  | <0.00000 | <0.000<br>00 | 0.0031<br>00 | <0.000<br>00 | <0.00<br>000 | 0.024<br>7   | <0.00<br>000 |
| Yb173 | <0.00000 | 0.0283   | 0.0262   | 0.0256<br>00 | <0.000<br>00 | 0.0044<br>4  | 0.004<br>72  | <0.00<br>000 | <0.00<br>000 |
| Lu175 | 0.0052   | <0.00000 | <0.00000 | <0.000<br>00 | <0.000<br>00 | <0.000<br>00 | <0.00<br>000 | <0.00<br>000 | <0.00<br>000 |
| Hf177 | 0.0258   | <0.00000 | 0.0219   | 0.0051<br>9  | <0.000<br>00 | 0.0031<br>2  | 0.004<br>69  | <0.00<br>000 | <0.00<br>000 |
| Ta181 | <0.00000 | <0.00000 | <0.00000 | <0.000<br>00 | <0.000<br>00 | 0.0031<br>2  | 0.004<br>69  | <0.00<br>000 | <0.00<br>000 |
| Pb208 | 0.0495   | 0.0403   | 0.0431   | 0.0267<br>00 | 0.0338<br>00 | 0.0295<br>00 | 0.046<br>7   | 0.045<br>8   | 0.034<br>7   |
| Th232 | <0.00000 | <0.00000 | <0.00000 | <0.000<br>00 | <0.000<br>00 | <0.000<br>00 | <0.00<br>000 | <0.00<br>000 | <0.00<br>000 |
| U238  | <0.00000 | <0.00000 | <0.00000 | <0.000<br>00 | <0.000<br>00 | <0.000<br>00 | <0.00<br>000 | <0.00<br>000 | 0.002<br>91  |
